# Supplementary material for: Engineering aggregation-induced SERS-active porous Au@ZnS multi-yolk–shell structures for visualization of guest species loading
Source: Royal Society of Chemistry journal article supplement (doi:10.1039/c6ra04432h), 2016-01-01
Supplement: c6ra04432h1.pdf [file c6ra04432h1.pdf]

## Supporting Information

### **Engineering Aggregation-Induced SERS-Active Porous Au@ZnS Multi-Yolk-Shell Structures for Visualization of Guest Species Loading**

Jing Liu,<sup>†,‡</sup> Liyong Chen,<sup>\*,†</sup> Binhua Duan,<sup>†</sup> Zhizhi Gu,<sup>†</sup> Qiong Luo,<sup>†</sup>  
Chunying Duan<sup>\*,†</sup>

<sup>†</sup>State Key Laboratory of Fine Chemicals, Dalian University of Technology, Dalian, 116024, PR China.

<sup>‡</sup>Department of Chemistry, Zhengzhou University, Zhengzhou, 450052, PR China.

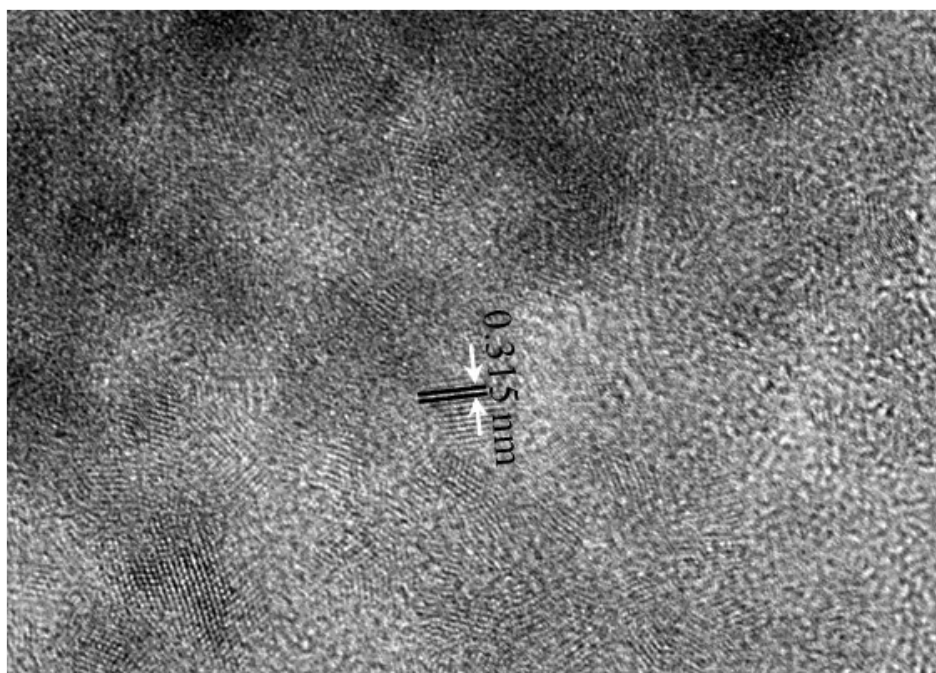

Figure S1. HRTEM image of ZnS shells of nanocages. The lattice fringe of 0.315 nm is corresponding to  $\{111\}$  facets of zinc blende.

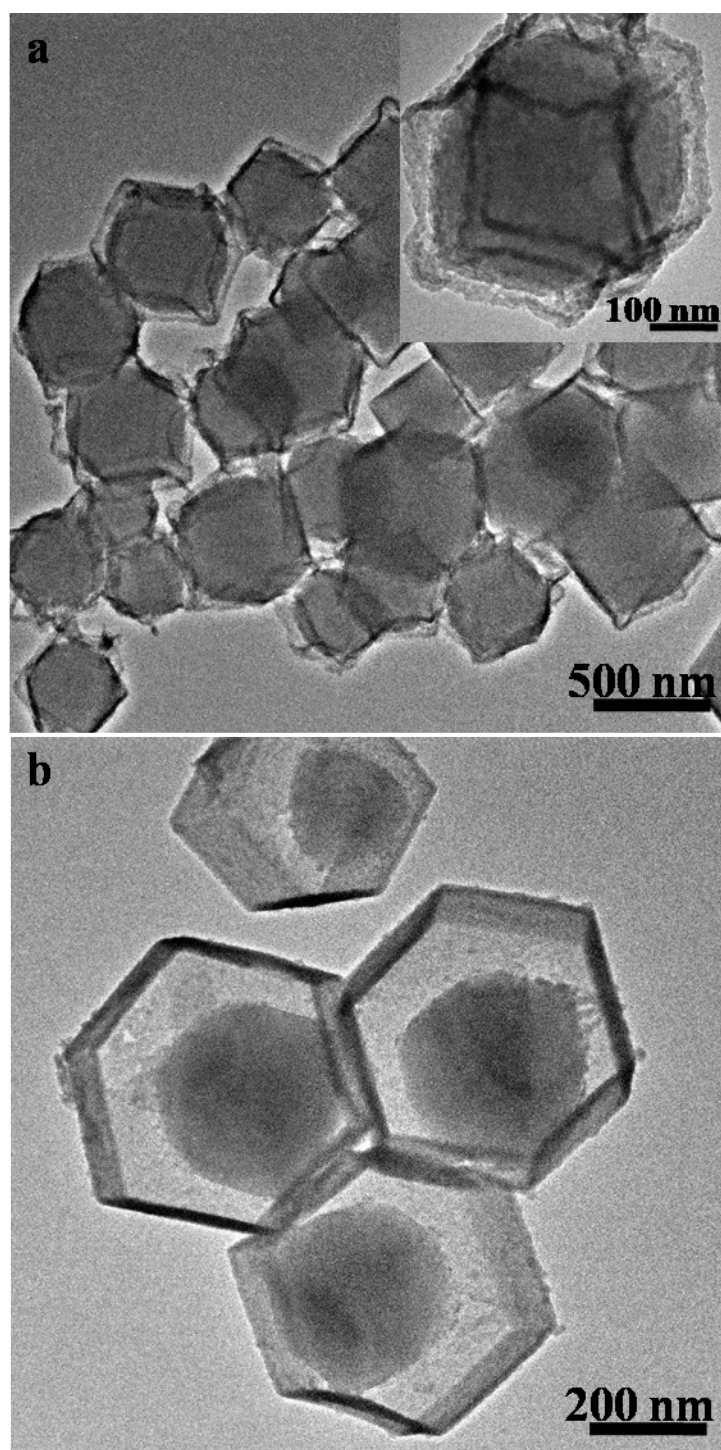

Figure S2. TEM images of time-dependent experiments for preparation of ZnS nanocages: (a) adding one portion of thioacetamide and reacting for 1.5 h and (b) adding three portions of thioacetamide at 1.5 intervals.

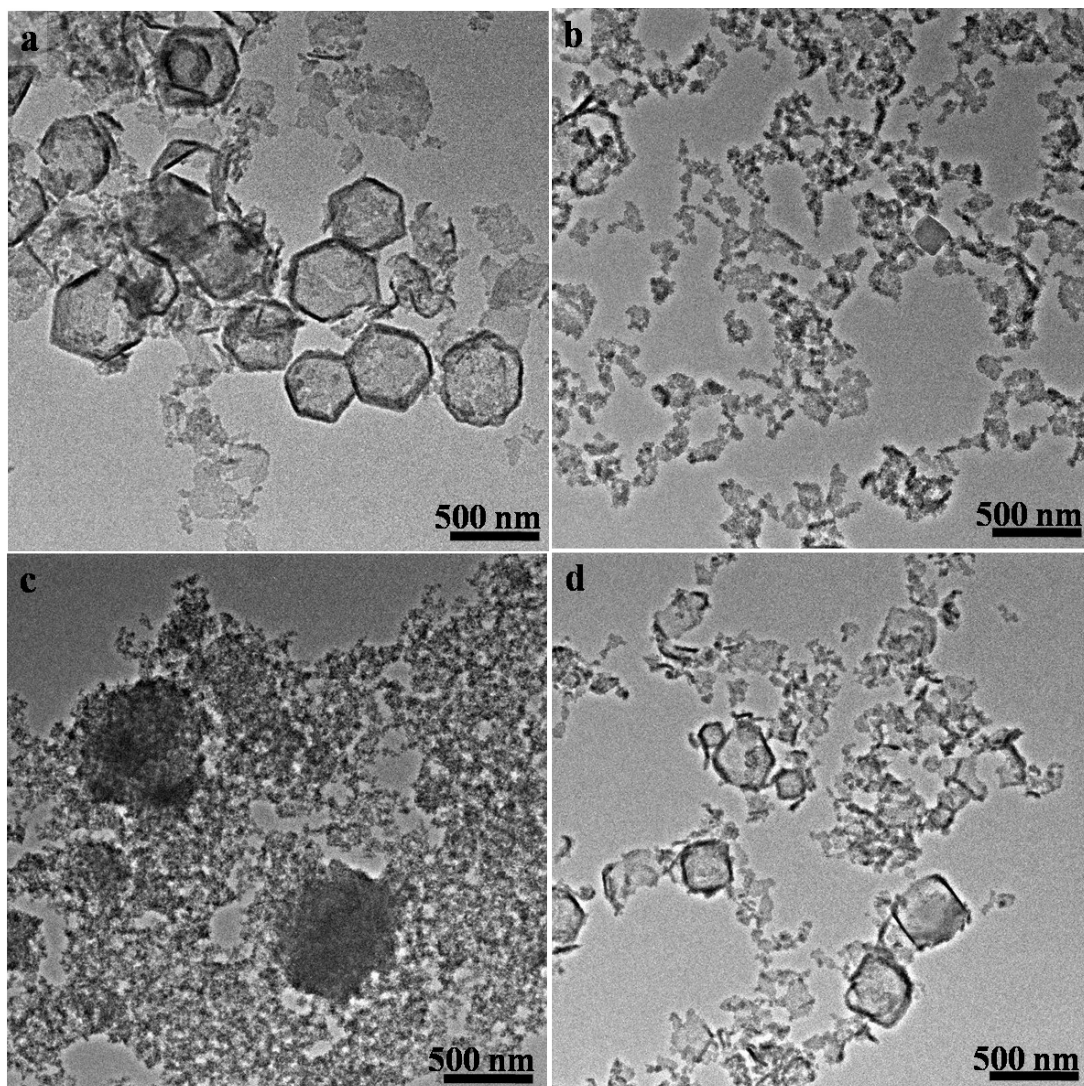

Figure S3. TEM images of ZnS prepared when increasing the volume of water to (a) 50 and (b) 200  $\mu\text{L}$ , (b) all thioacetamide added one shot, and (d) ethanol instead of acetonitrile.

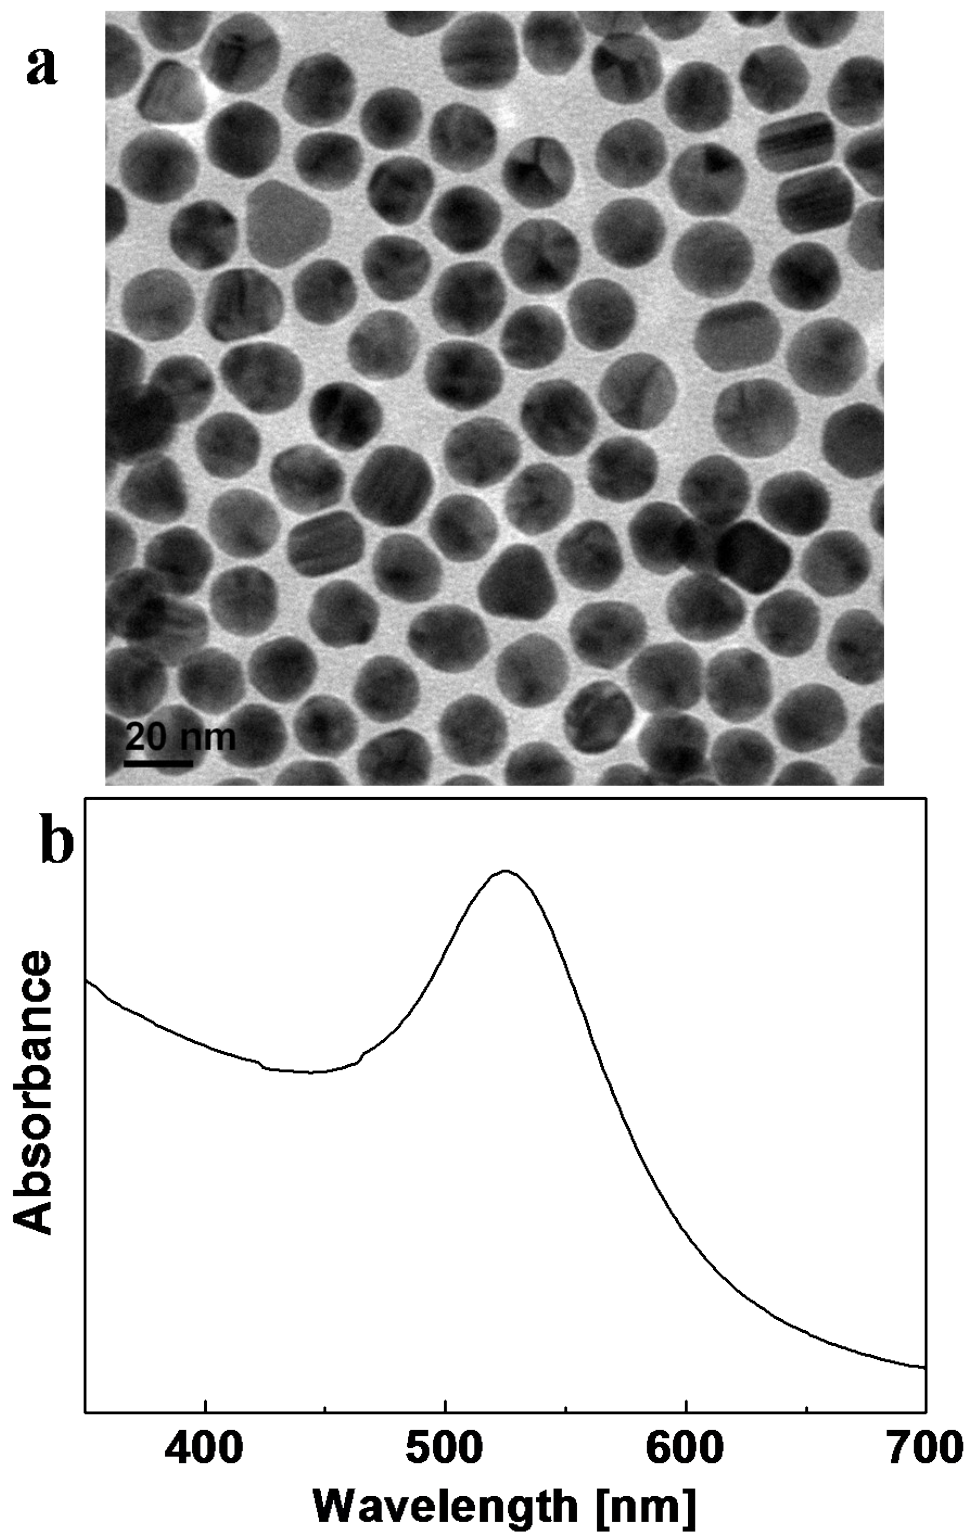

Figure S4. (a) TEM images and (b) UV-vis adsorption spectrum of Au NPs ( $d = 15$  nm).



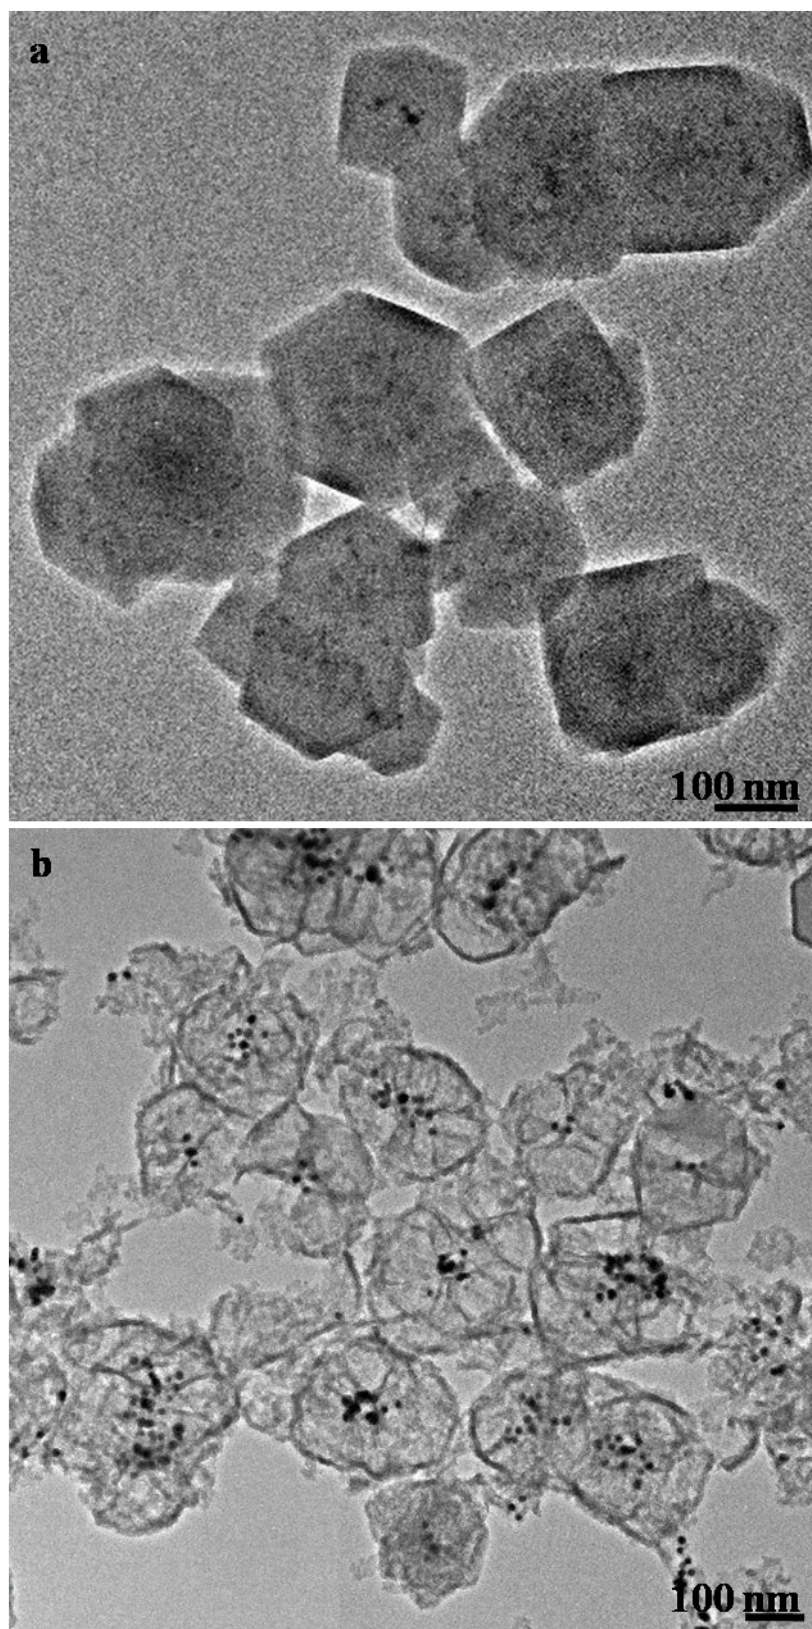

Figure S5. TEM images of (a) Au@ZIF-8 multi-faceted nanocomposites prepared when increasing the concentration of  $\text{Zn}(\text{NO}_3)_2$  and Hmim solution to 12.5 mM, and (b) sample derived from the multi-faceted Au@ZIF-8 nanocomposites by the same synthetic route as that of ZnS nanocages.
